# Supplementary material for: The Development of a Mobile Monitoring and Feedback Tool to Stimulate Physical Activity of People With a Chronic Disease in Primary Care: A User-Centered Design
Source: PubMed Central journal article supplement (PMC4114510; doi:10.2196/mhealth.2526), 2013-07-02
Supplement: mhealth_v1i1e8_app1.pdf [file mhealth_v1i1e8_app1.pdf]

**Attachment 1. Results of three rounds of information gathering revealed from people with COPD or type 2 diabetes in stage 3, illustrating the dynamic specification process of requirements.**

| <u>Interview topics</u> | <u>Results 1st interview round</u> | <u>Results 2nd interview round</u> | <u>Results focus groups</u> |
|-------------------------|------------------------------------|------------------------------------|-----------------------------|
|-------------------------|------------------------------------|------------------------------------|-----------------------------|

**Tool architecture**

| <b>Place activity sensor</b> |                            |                           |     |
|------------------------------|----------------------------|---------------------------|-----|
|                              | On Shoe*                   | On hip with strap or clip | Hip |
|                              | On Hip with strap or clip* | In watch                  |     |
|                              | Around leg*                |                           |     |
|                              | In watch/bracelet*         |                           |     |
|                              | Necklace                   |                           |     |
|                              | In glasses                 |                           |     |
|                              | In shoe soles              |                           |     |
|                              | Implant                    |                           |     |
|                              | On bra-strap               |                           |     |
|                              | In inhaler [47]            |                           |     |
|                              | On insulin pump (DM2)      |                           |     |

\* these options were proposed in the second interview round

| <b>Requirements</b> | Consistent measurement | Lightweight | Consistent |
|---------------------|------------------------|-------------|------------|
|---------------------|------------------------|-------------|------------|

**activity sensor**

|                                 |                                                      |                                                                           |
|---------------------------------|------------------------------------------------------|---------------------------------------------------------------------------|
| Not hinder movements            | Shockproof                                           | measurement                                                               |
| Unobtrusive                     | Not hinder movements                                 | Shockproof                                                                |
| Design not important            |                                                      | Not hinder movements                                                      |
| Hygienic                        | Unobtrusive for yourself and others                  | Unobtrusive for yourself and others                                       |
| You should not be able to cheat | Design not important                                 | Design not important                                                      |
| Waterproof                      | Neutral color (possibly leather or fabric around it) | Large clip<br>Not wider than belt<br>Hygienic                             |
|                                 | Requirements for activity sensor on hip:             | No interference with insulin pump                                         |
|                                 | Large clip and no strap                              | Indication if battery is low                                              |
|                                 | Not wider than belt                                  | Battery life of a week<br>Case for device to attach to belt<br>Waterproof |

**Goal setting**

|      |                          |                          |          |
|------|--------------------------|--------------------------|----------|
| What | Day goal                 | Day goal                 | Day goal |
|      | Week goal                | Personally relevant goal |          |
|      | Personally relevant goal |                          |          |

|             |                                         |                                         |                                         |
|-------------|-----------------------------------------|-----------------------------------------|-----------------------------------------|
| Who         | In collaboration with care professional | In collaboration with care professional | In collaboration with care professional |
|             | Independent                             |                                         |                                         |
| Change goal | In collaboration with care professional | independent after message tool          | In collaboration with care professional |
|             | Independent                             |                                         | Independent after message tool          |

## Feedback

### 1. Amount of activity

|          |                                                          |                                  |                  |
|----------|----------------------------------------------------------|----------------------------------|------------------|
| What     | Minutes                                                  | Minutes total                    | Minutes          |
|          | Steps                                                    | Difference in intensity          | Activity history |
|          | Heart rate                                               | Heart rate                       |                  |
|          | Kilometers                                               | Activity history on the computer |                  |
|          | Relation of activity with blood glucose levels and apnea |                                  |                  |
|          | Activity history to see pattern and decline in activity  |                                  |                  |
| Where    | Activity sensor                                          | Mobile phone                     | Mobile phone     |
|          | Mobile phone                                             | Computer                         |                  |
|          | Computer                                                 |                                  |                  |
|          | By mail                                                  |                                  |                  |
| Feedback |                                                          | Possibility to annotate          |                  |

requirements

the activity data

## 2. Amount of activity compared to goal

|       |                                                                                                                                    |                                                      |                                                                              |
|-------|------------------------------------------------------------------------------------------------------------------------------------|------------------------------------------------------|------------------------------------------------------------------------------|
| What  | Achieving goal yes/no<br>Percentage of goal<br>achieved                                                                            | Percentage of goal<br>achieved                       | Percentage of goal<br>achieved<br>Achieving goal yes/no<br>Feedback messages |
| Where | Activity sensor<br>Mobile phone<br>Computer                                                                                        | Mobile phone<br>Computer                             | Mobile phone                                                                 |
| How   | By mail<br>Graph<br>Picture<br>Text<br>Numeral<br>Percentage<br>Scale (0-100)<br>Sound<br>Color<br>Cheering<br>Vibration<br>Lights | Graph<br>Numeral<br>Percentage<br>Color<br>Vibration | Text<br>Percentage<br>Color<br>Image                                         |

## 3. Response of a health professional based on the activity results

|        |                             |                                                |                 |
|--------|-----------------------------|------------------------------------------------|-----------------|
| Who    | Practice nurse              | Practice nurse                                 | Practice nurse  |
|        | General practitioner        | General practitioner                           |                 |
|        | Physiotherapist             |                                                |                 |
|        | Diabetes nurse              |                                                |                 |
|        | Internist                   |                                                |                 |
|        | Pulmonary nurse             |                                                |                 |
| How    | By phone                    | By phone                                       | By phone        |
|        | In consultation             | In consultation                                | In consultation |
| Effect | Extra motivator             | Extra motivator                                | Extra motivator |
|        | One person does not like it | One person: Only if I bring the results myself |                 |

### **Data sharing**

|                                       |                                                                             |                                                                             |                                                                             |
|---------------------------------------|-----------------------------------------------------------------------------|-----------------------------------------------------------------------------|-----------------------------------------------------------------------------|
| Share activity results with peers     | No need to do this automatically, only in real life                         | No need to do this automatically, only in real life                         | No need to do this automatically, only in real life                         |
| Share activity results with relatives | No need to do this automatically (Facebook, Twitter etc.) only in real life | No need to do this automatically (Facebook, Twitter etc.) only in real life | No need to do this automatically (Facebook, Twitter etc.) only in real life |
